# Supplementary material for: Reducing maternal mortality in China in the era of the two-child policy
Source: PubMed Central journal article supplement — BMJ Glob Health. 2020 Feb 23;5(2):e002157. doi: 10.1136/bmjgh-2019-002157 (PMC7042574; doi:10.1136/bmjgh-2019-002157), 2020-02-23
Supplement: bmjgh-2019-002157supp001.pdf [file bmjgh-2019-002157supp001.pdf]

## Supplemental files.

## Supplemental Fig 1 | Reduced maternal mortality ratio attributable to the FSMNS in the two-child policy era

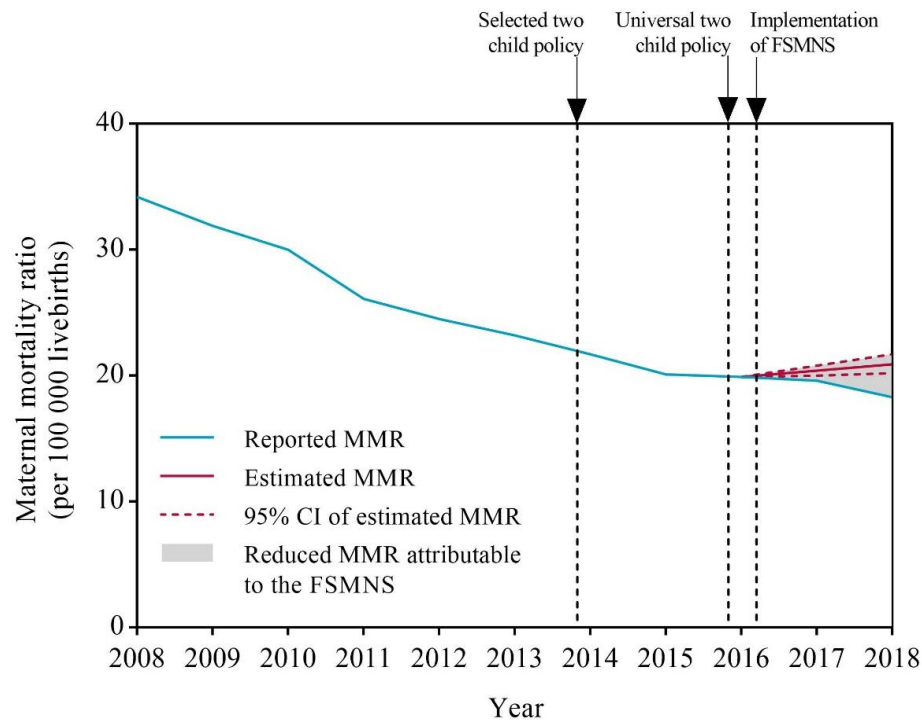

Notes: Data were extracted from the National Health Statistics Yearbooks in China.

Abbreviations: MMR, maternal mortality ratio; FSMNS, Five Strategies for Maternal and Newborn Safety; CI, confidence interval

Interrupted time series model was used to evaluate the impact of policies. The original downward trend of MMR (2008-2013) was slowed down (2014-2016) after the implementation of the selected two-child policy (slope change 1.42, 95%CI 1.03 to 1.81,  $p < 0.001$ ). We assume that, if the FSMNS are not implemented, the slope change of MMR during the implementation of the universal two-child policy are the same as that during the selected two-child policy era. The purple line is estimated MMR without the intervention of FSMNS. The gray shadow is reduced MMR attributable to the FSMNS.
